# Supplementary material for: Post-conflict opponent affiliation reduces victim re-aggression in a family group of captive arctic wolves (Canis lupus arctos)
Source: PubMed Central journal article supplement (PMC5673216; doi:10.1371/journal.pone.0187450), 2017-11-06
Supplement: pone.0187450.s002.pdf [file pone.0187450.s002.pdf]

| *          | macchia | viki | maschera | secondo | sfregiato | due | zampa | uno beta | taglio | lacrima | cane | sosia | muso lungo | volpe | normale | muso corto | storto | procione | husky |
|------------|---------|------|----------|---------|-----------|-----|-------|----------|--------|---------|------|-------|------------|-------|---------|------------|--------|----------|-------|
| macchia    | *       | 5    | 17       | 7       | 15        | 5   | 3     | 2        | 7      | 4       | 3    | 1     | 5          | 8     | 2       | 6          | 2      | 5        | 4     |
| viki       | 2 *     |      | 6        | 7       | 5         | 4   | 3     | 78       | 1      | 38      | 4    | 3     | 4          | 39    | 4       | 9          | 1      | 0        | 1     |
| maschera   | 0       | 0 *  |          | 1       | 36        | 4   | 1     | 3        | 4      | 6       | 1    | 0     | 4          | 4     | 0       | 1          | 3      | 1        | 0     |
| secondo    | 0       | 0    | 0 *      |         | 5         | 1   | 0     | 1        | 1      | 1       | 0    | 3     | 0          | 1     | 0       | 3          | 1      | 2        | 1     |
| sfregiato  | 0       | 0    | 0        | 2 *     |           | 2   | 0     | 2        | 4      | 1       | 0    | 2     | 2          | 2     | 0       | 1          | 1      | 1        | 0     |
| due        | 0       | 0    | 0        | 0       | 0 *       |     | 1     | 0        | 0      | 0       | 0    | 0     | 0          | 0     | 0       | 2          | 0      | 0        | 0     |
| zampa      | 0       | 0    | 0        | 0       | 0         | 0 * |       | 1        | 1      | 0       | 0    | 0     | 0          | 0     | 0       | 1          | 0      | 2        | 1     |
| uno beta   | 0       | 0    | 0        | 0       | 0         | 0   | 0 *   |          | 0      | 7       | 3    | 2     | 0          | 28    | 0       | 3          | 0      | 0        | 0     |
| taglio     | 0       | 0    | 0        | 0       | 1         | 0   | 0     | 0 *      |        | 0       | 2    | 0     | 0          | 0     | 3       | 1          | 2      | 0        | 0     |
| lacrima    | 0       | 0    | 0        | 0       | 0         | 0   | 0     | 0        | 0 *    |         | 11   | 2     | 0          | 0     | 14      | 31         | 0      | 0        | 0     |
| cane       | 0       | 0    | 0        | 0       | 0         | 0   | 0     | 1        | 1      | 0 *     |      | 2     | 1          | 12    | 0       | 122        | 0      | 4        | 0     |
| sosia      | 0       | 0    | 0        | 0       | 0         | 0   | 1     | 0        | 0      | 0       | 1 *  |       | 1          | 0     | 0       | 8          | 0      | 1        | 0     |
| muso lungo | 0       | 0    | 0        | 0       | 0         | 0   | 0     | 0        | 0      | 0       | 0    | 0 *   |            | 1     | 0       | 0          | 0      | 0        | 0     |
| volpe      | 0       | 0    | 0        | 0       | 0         | 0   | 0     | 0        | 0      | 17      | 0    | 0     | 0 *        |       | 7       | 11         | 0      | 0        | 0     |
| normale    | 0       | 0    | 0        | 0       | 0         | 0   | 0     | 0        | 0      | 0       | 0    | 0     | 0 *        |       | 1       | 0          | 0      | 0        |       |
| muso corto | 0       | 0    | 0        | 0       | 0         | 0   | 0     | 0        | 0      | 0       | 0    | 3     | 0          | 0     | 0 *     |            | 0      | 4        | 0     |
| storto     | 0       | 0    | 0        | 0       | 0         | 0   | 0     | 0        | 0      | 0       | 0    | 0     | 0          | 0     | 0       | 0 *        |        | 1        | 0     |
| procione   | 0       | 0    | 0        | 0       | 0         | 0   | 0     | 0        | 0      | 0       | 0    | 0     | 0          | 0     | 0       | 0          | 0 *    |          | 0     |
| husky      | 0       | 0    | 0        | 0       | 0         | 0   | 0     | 0        | 0      | 0       | 0    | 0     | 0          | 0     | 0       | 3          | 0      | 0 *      |       |
