# Supplementary material for: Post-conflict opponent affiliation reduces victim re-aggression in a family group of captive arctic wolves (Canis lupus arctos)
Source: PubMed Central journal article supplement (PMC5673216; doi:10.1371/journal.pone.0187450), 2017-11-06
Supplement: pone.0187450.s003.pdf [file pone.0187450.s003.pdf]

| *          | macchia | viki | maschera | secondo | sfregiato | due | zampa | uno beta | taglio | lacrima | cane | sosia | muso lungo | volpe | normale | muso corto | storto | procione | husky |
|------------|---------|------|----------|---------|-----------|-----|-------|----------|--------|---------|------|-------|------------|-------|---------|------------|--------|----------|-------|
| macchia    | *       | 1    | 0        | 0       | 0         | 0   | 0     | 0        | 0      | 0       | 0    | 0     | 0          | 0     | 0       | 0          | 0      | 0        | 0     |
| viki       | 0       | *    | 0        | 0       | 0         | 0   | 0     | 0        | 0      | 0       | 0    | 0     | 0          | 0     | 0       | 0          | 0      | 0        | 0     |
| maschera   | 14      | 1    | *        | 0       | 0         | 0   | 0     | 0        | 0      | 0       | 0    | 0     | 0          | 0     | 0       | 0          | 0      | 0        | 0     |
| secondo    | 14      | 3    | 4        | *       | 2         | 0   | 0     | 0        | 0      | 0       | 0    | 0     | 0          | 0     | 0       | 0          | 0      | 0        | 0     |
| sfregiato  | 4       | 2    | 13       | 4       | *         | 0   | 0     | 0        | 0      | 0       | 0    | 0     | 0          | 0     | 0       | 0          | 0      | 0        | 0     |
| due        | 10      | 1    | 3        | 2       | 1         | *   | 0     | 0        | 0      | 0       | 0    | 0     | 0          | 0     | 0       | 0          | 0      | 0        | 0     |
| zampa      | 3       | 0    | 0        | 0       | 0         | 0   | 0     | *        | 0      | 0       | 0    | 0     | 0          | 0     | 0       | 0          | 0      | 0        | 0     |
| uno beta   | 6       | 48   | 1        | 0       | 0         | 1   | 0     | *        | 0      | 0       | 0    | 0     | 0          | 0     | 0       | 0          | 0      | 0        | 0     |
| taglio     | 13      | 2    | 3        | 0       | 7         | 1   | 1     | 0        | *      | 0       | 0    | 0     | 0          | 0     | 0       | 0          | 1      | 0        | 0     |
| lacrima    | 3       | 27   | 1        | 2       | 1         | 0   | 0     | 1        | 0      | *       | 0    | 0     | 1          | 9     | 0       | 0          | 0      | 0        | 0     |
| cane       | 2       | 1    | 0        | 0       | 0         | 0   | 0     | 3        | 0      | 6       | *    | 1     | 0          | 0     | 0       | 0          | 0      | 0        | 0     |
| sosia      | 2       | 1    | 0        | 0       | 1         | 1   | 1     | 0        | 0      | 0       | 1    | *     | 0          | 0     | 0       | 11         | 0      | 0        | 0     |
| muso lungo | 22      | 5    | 10       | 0       | 10        | 0   | 0     | 1        | 0      | 2       | 0    | 0     | *          | 1     | 0       | 0          | 0      | 0        | 0     |
| volpe      | 4       | 31   | 1        | 2       | 2         | 0   | 0     | 2        | 0      | 0       | 0    | 0     | 0          | 1     | *       | 0          | 0      | 0        | 0     |
| normale    | 1       | 3    | 0        | 0       | 0         | 0   | 0     | 0        | 0      | 6       | 0    | 0     | 0          | 4     | *       | 0          | 0      | 0        | 0     |
| muso corto | 13      | 11   | 0        | 2       | 2         | 1   | 0     | 1        | 1      | 16      | 42   | 2     | 1          | 8     | 1       | *          | 0      | 0        | 0     |
| storto     | 4       | 4    | 3        | 0       | 1         | 0   | 0     | 1        | 4      | 1       | 0    | 0     | 0          | 2     | 2       | 2          | *      | 0        | 0     |
| procione   | 23      | 1    | 3        | 2       | 5         | 7   | 2     | 1        | 2      | 1       | 7    | 1     | 5          | 0     | 0       | 3          | 1      | *        | 0     |
| husky      | 1       | 2    | 4        | 0       | 0         | 0   | 1     | 0        | 0      | 1       | 0    | 0     | 1          | 0     | 0       | 0          | 0      | 1        | *     |
